# Supplementary material for: Multiplexing of miniaturized planar antibody arrays for serum protein profiling – a biomarker discovery in SLE nephritis
Source: Royal Society of Chemistry journal article supplement (doi:10.1039/c3lc51420j), 2014-01-01
Supplement: c3lc51420j1.pdf [file c3lc51420j1.pdf]

### Supplementary Figure 1.

| Comparison              | AUC  | Significant clones ( $p < 0.05$ ) |         |          |
|-------------------------|------|-----------------------------------|---------|----------|
|                         |      | C1q                               | LDL (1) | IL-8 (1) |
| SLE vs. Normal          | 0.63 | ↓                                 | ↑       |          |
| SLE (3-14*) vs. Normal  | 0.57 | ↓                                 | ↑       |          |
| SLE (16-32)* vs. Normal | 0.76 | ↓                                 | ↑       |          |
| SLE (3-10)* vs. Normal  | 0.43 |                                   | ↑       |          |
| SLE (12-17)* vs. Normal | 0.57 |                                   |         |          |
| SLE (18-32)* vs. Normal | 0.87 | ↓                                 |         | ↓        |

\*= SLEDAI-2K

### Supplementary Figure 1

Protein expression profiling of biotinylated serum using the miniaturized 48-plex antibody array platform and normalized with the subtract by geometric group mean strategy. The SLE nephritis patients was grouped based on SLEDAI-2K, first into two broad groups based on high (16-32) and low (3-14) disease activity and second into three groups low (3-10), mid (12-17) and high (18-32) disease activity. The classification of SLE nephritis patients and healthy controls was performed using a leave one out cross validation test, illustrated as AUC values. Differentially expressed ( $p < 0.05$ ) serum analytes, identified using Wilcoxon signed ranked test.
